# Supplementary material for: Fetal and Infant Effects of Maternal Opioid Use during Pregnancy: A Literature Review including Clinical, Toxicological, Pharmacogenomic, and Epigenetic Aspects for Forensic Evaluation
Source: MDPI journal article supplement (doi:10.3390/children11030278), 2024-02-23
Supplement: s1 [file s1]

**Table S1.** Studies on opioid exposure during pregnancy.

| Article                        | Article type        | Opioid class                                                         | Sample size                             | Issue of interest                        | Main findings                                                                                                           |
|--------------------------------|---------------------|----------------------------------------------------------------------|-----------------------------------------|------------------------------------------|-------------------------------------------------------------------------------------------------------------------------|
| <i>Kaltenbach et al. [1]</i>   | Review              | Metahdone, heroin                                                    | /                                       | Foetus and infant cause of death         | Overview of the main fetal and infant complications                                                                     |
| <i>Sithisarn et al. [2]</i>    | Review              | Opiates                                                              | /                                       | Foetus and infant cause of death         | Overview of the main infant complications                                                                               |
| <i>Bertaso et al. [5]</i>      | Retrospective study | Morphine, methadone                                                  | 51                                      | Toxicological analyses                   | Assessment of in utero exposure to drugs                                                                                |
| <i>Friguls et al. [6]</i>      | Experimental study  | Opiates                                                              | 107                                     | Foetus and infant cause of death         | Assessment of in utero exposure to drugs                                                                                |
| <i>Lam et al. [9]</i>          | Retrospective study | Methadone, heroin                                                    | 51                                      | Foetus and infant cause of death         | Overview of the main fetal and infant complications                                                                     |
| <i>Fishman et al. [11]</i>     | Retrospective study | Propoxyphene, codeine, tramadol, oxycodone, fentanyl                 | 3003                                    | Foetus and infant cause of death         | Analysis for total major malformations and for spina bifida                                                             |
| <i>Pötsch et al. [12]</i>      | Case report         | Heroin metabolites, morphine                                         | 1                                       | Toxicological analyses                   | All the fetal specimens were investigated                                                                               |
| <i>Rausgaard et al. [14]</i>   | Retrospective study | Codeine, tramadol, oxycodone, morphine                               | 10878 pregnant women                    | Foetus and infant cause of death         | Trend modifications in opioid prescriptions in pregnancy in the period 1997-2016 and intrauterine effects of exposition |
| <i>Bhatt-Mehta et al. [15]</i> | Retrospective study | Methadone                                                            | 11 opioid-dependent mother-infant dyads | Toxicological analyses                   | Evaluate maternal and umbilical cord plasma concentrations of methadone and EDDP                                        |
| <i>Bashore et al. [16]</i>     | Review              | Heroin                                                               | /                                       | Foetus and infant cause of death         | Overview of the main fetal and infant complications                                                                     |
| <i>Anbalagan et al. [17]</i>   | Review              | Methadone, heroin, buprenorphine                                     | /                                       | Foetus and infant cause of death         | Neonatal abstinence syndrome                                                                                            |
| <i>Ryan et al. [18]</i>        | Review              | Methadone, heroin, buprenorphine                                     | /                                       | Foetus and infant cause of death         | Overview of the main fetal and infant complications                                                                     |
| <i>Esposito et al. [19]</i>    | Retrospective study | Prescription opioid in pregnancy (except opioid replacement therapy) | 1,833,871 pregnant women                | Foetus and infant cause of death         | Overview of the main fetal and infant complications                                                                     |
| <i>Borrelli et al. [20]</i>    | Experimental study  | Methadone/Fentanil/Buprenorphine                                     | 40                                      | Epigenetic analyses                      | Prenatal opioid exposure and placental epigenetic changes lead to abnormal fetal brain development and NOWS             |
| <i>Little et al. [21]</i>      | Research study      | Heroin                                                               | 24                                      | Foetus and infant cause of death         | Overview of the main fetal and infant complications                                                                     |
| <i>O'Donnell et al. [22]</i>   | Communication       | Heroin                                                               | /                                       | Foetus and infant clinical complications | Overview on management of opioid use disorder in pregnancy                                                              |
| <i>Kandall et al. [23]</i>     | Retrospective study | Methadone, heroin                                                    | 337 newborns                            | Foetus and infant cause of death         | Birth weight analysis                                                                                                   |

|                               |                     |                                    |                          |                                          |                                                                                                            |
|-------------------------------|---------------------|------------------------------------|--------------------------|------------------------------------------|------------------------------------------------------------------------------------------------------------|
| <i>Wolff et al. [24]</i>      | Communication       | Heroin, methadone                  | /                        | Foetus and infant clinical complications | Opioid Neonatal Abstinence Syndrome                                                                        |
| <i>Athanasakis et al [25]</i> | Review              | Opiates                            | /                        | Foetus and infant cause of death         | Contributing factors to SIDS                                                                               |
| <i>Maguire et al. [26]</i>    | Meta-analysis       | Methadone, buprenorphine           | /                        | Foetus and infant clinical complications | Long-term outcomes of the prenatal exposure                                                                |
| <i>Benck et al. [27]</i>      | Retrospective study | Methadone, buprenorphine           | 371                      | Foetus and infant clinical complications | Care of pregnant incarcerated persons with opioid use disorder                                             |
| <i>Burns et al. [28]</i>      | Retrospective study | Methadone                          | 675310 liveborn infants  | Foetus and infant cause of death         | Risk of in infant death in methadone maintenance therapy                                                   |
| <i>Caritis et al. [29]</i>    | Communication       | Morphine, methadone                | /                        | Foetus and infant clinical complications | Implication on fetal brain                                                                                 |
| <i>Cohen et al. [30]</i>      | Research article    | Heroin, methadone                  | 138 neonatal autopsies   | Infant cause of death                    | SIDS association                                                                                           |
| <i>Conradt et al. [31]</i>    | Review              | Morphine, methadone, buprenorphine | /                        | Foetus and infant clinical complications | Neurodevelopmental consequences                                                                            |
| <i>Concheiro et al. [32]</i>  | Research study      | Opioids, methadone                 | 727 mother–infant dyads  | Toxicological analyses                   | Maternal hair resulted as the most sensitive specimen to detect drug exposure during pregnancy             |
| <i>de Castro et al. [33]</i>  | Research study      | Methadone                          | 19                       | Toxicological analyses                   | Umbilical cord methadone concentrations were correlated to methadone doses                                 |
| <i>Dryden et al. [34]</i>     | Retrospective study | Methadone                          | 450                      | Foetus and infant clinical complications | Development of neonatal abstinence syndrome                                                                |
| <i>Duska et al. [35]</i>      | Retrospective study | Methadone, naloxone                | 12                       | Foetus and infant cause of death         | Provide a framework for other Ob/Gyn clinics to use in implementing similar naloxone distribution programs |
| <i>Epstein et al. [36]</i>    | Retrospective study | Morphine, methadone, buprenorphine | 14448                    | Foetus and infant clinical complications | Prevalence of prescribed opioid analgesics among pregnant women from 1995 to 2009                          |
| <i>Galli et al. [37]</i>      | Case series         | Methadone                          | 2                        | Foetus and infant clinical complications | Long-Term Visual and Neurodevelopmental Outcomes                                                           |
| <i>Garrison et al. [38]</i>   | Retrospective study | Morphine, methadone                | 59                       | Foetus and infant clinical complications | Fetal Growth Outcomes                                                                                      |
| <i>Irnes et al. [39]</i>      | Retrospective study | Morphine, methadone                | 16                       | Foetus and infant clinical complications | Brain morphology with magnetic resonance imaging                                                           |
| <i>Kandall et al. [40]</i>    | Review              | Heroin, methadone                  | /                        | Foetus and infant cause of death         | Association between opiates and SIDS                                                                       |
| <i>Kandall et al. [41]</i>    | Retrospective study | Heroin, methadone                  | 1760 SIDS cases analyzed | Foetus and infant cause of death         | Association between opiates and SIDS                                                                       |
| <i>Kushmir et al. [42]</i>    | Retrospective study | Methadone, buprenorphine           | 290                      | Foetus and infant clinical complications | Different between prenatally exposed to methadone or buprenorphine                                         |

|                              |                     |                          |                                                                    |                                          |                                                                                                                                                                |
|------------------------------|---------------------|--------------------------|--------------------------------------------------------------------|------------------------------------------|----------------------------------------------------------------------------------------------------------------------------------------------------------------|
| <i>McCarthy et al. [43]</i>  | Communication       | Methadone, buprenorphine | /                                                                  | Foetus and infant clinical complications | Buprenorphine versus Methadone in Pregnancy                                                                                                                    |
| <i>López et al. [44]</i>     | Case report         | Codeine                  | 1                                                                  | Toxicological analyses                   | levels of drugs disappeared by the third day                                                                                                                   |
| <i>McGlone et al. [45]</i>   | Retrospective study | Methadone                | 81                                                                 | Foetus and infant clinical complications | Abnormal visual electrophysiology                                                                                                                              |
| <i>Monnelly et al. [46]</i>  | Meta-analysis       | Methadone                | /                                                                  | Foetus and infant clinical complications | Childhood neurodevelopment                                                                                                                                     |
| <i>Montanari et al. [47]</i> | Case report         | Methadone                | 1                                                                  | Foetus and infant cause of death         | Methadone contribution to IUFD                                                                                                                                 |
| <i>Montanari et al. [48]</i> | Case report         | Methadone                | 1                                                                  | Foetus and infant cause of death         | Genetic assessment of methadone fetal clearance                                                                                                                |
| <i>Newbury et al. [49]</i>   | Retrospective study | Methadone                | 80                                                                 | Foetus and infant clinical complications | Social adversity, caregiver psychological factors, and language outcomes                                                                                       |
| <i>Pandya et al. [50]</i>    | Retrospective study | Morphine                 | 175000                                                             | Toxicological analyses                   | Assessment of the most common drug combination in meconium                                                                                                     |
| <i>Ordean et al. [51]</i>    | Retrospective study | Buprenorphine            | /                                                                  | Toxicological analyses                   | buprenorphine-naloxone is a safe and effective opioid agonist treatment for pregnant people                                                                    |
| <i>Ostrea et al. [52]</i>    | Research study      | Opiates                  | 58                                                                 | Toxicological analyses                   | Estimates of illicit drug use during pregnancy by hair analysis and meconium analysis                                                                          |
| <i>Parikh et al. [53]</i>    | Research study      | methadone                | 36                                                                 | Toxicological analyses                   | Newborns exposed to methadone are at risk of cardiac rhythm disturbances                                                                                       |
| <i>Ramirez et al. [54]</i>   | Retrospective study | Methadone                | 56                                                                 | Foetus and infant clinical complications | Intrapartum fetal heart rate patterns                                                                                                                          |
| <i>Robert et al. [55]</i>    | Research study      | Buprenorphine            | 9 mothers<br>4 infants                                             | Toxicological analyses                   | Significant positive association between concentrations of buprenorphine and norbuprenorphine in maternal hair and a trend for this association in infant hair |
| <i>Ross et al. [56]</i>      | Review              | Opiates                  | /                                                                  | Toxicological analyses                   | Drugs effect on developing nervous system                                                                                                                      |
| <i>Serra et al. [57]</i>     | Retrospective study | Methadone, buprenorphine | 86<br>(buprenorphine) + 268<br>(methadone)<br>exposed<br>placentas | Foetus and infant cause of death         | Placental histological examination                                                                                                                             |
| <i>Spowart et al. [58]</i>   | Retrospective study | Methadone                | 153                                                                | Foetus and infant clinical complications | Executive functioning, behavioural, emotional, and cognitive difficulties                                                                                      |
| <i>Ward et al. [59]</i>      | Retrospective study | Opiates                  | 497 infants                                                        | Foetus and infant cause of death         | Effects of opiates on the fetus and the infant                                                                                                                 |

|                                 |                      |                                                      |                                                     |                                          |                                                                                                                                                                             |
|---------------------------------|----------------------|------------------------------------------------------|-----------------------------------------------------|------------------------------------------|-----------------------------------------------------------------------------------------------------------------------------------------------------------------------------|
| <i>Towers et al. [60]</i>       | Retrospective study  | Morphine, methadone                                  | 429                                                 | Foetus and infant clinical complications | Head circumference in neonatal abstinence syndrome                                                                                                                          |
| <i>Whiteman et al. [61]</i>     | Retrospective study  | Opioid                                               | 138,224 pregnant women                              | Foetus and infant cause of death         | Effects of opiates on the fetus and the infant                                                                                                                              |
| <i>Walhovd et al. [62]</i>      | Research study       | opiates                                              | 14                                                  | Toxicological analyses                   | Myelin may be particularly vulnerable to prenatal substance exposure                                                                                                        |
| <i>Wurst et al. [63]</i>        | Research study       | Buprenorphine, methadone                             | 176 (buprenorphine) + 52 (methadone) pregnant women | Foetus and infant cause of death         | Effects of opiates on the fetus and the infant                                                                                                                              |
| <i>Zedler et al. [64]</i>       | Review               | Buprenorphine, methadone                             | /                                                   | Toxicological analyses                   | Evidence of lower risk of preterm birth, greater birth weight and larger head circumference with buprenorphine treatment during pregnancy compared with methadone treatment |
| <i>Zipursky et al. [65]</i>     | Review               | Opioids                                              | /                                                   | Toxicological analyses                   | Opioid use in pregnancy and how this relates to maternal and neonatal health outcomes                                                                                       |
| <i>Crews et al. [66]</i>        | Review               | Codeine, tramadol, hydrocodone, oxycodone, methadone | /                                                   | Pharmacogenetic analyses                 | Implementation Consortium Guidelines for opioids therapy and CYP2D6, OPRM1, and COMT genotyping                                                                             |
| <i>CPIC Guideline [67]</i>      | Guidelines           | Drugs                                                | /                                                   | Pharmacogenetic analyses                 | Pharmacogenetic test and drug therapy                                                                                                                                       |
| <i>Yalçın et al. [68]</i>       | Review               | Morphine, methadone, tramadol, sufentanil, midazolam | /                                                   | Pharmacogenetic analyses                 | Pharmacogenetics in infants and neonates                                                                                                                                    |
| <i>Madaadi et al. [69]</i>      | Review               | Morphine, synthetic and semi-synthetic opioids       | /                                                   | Pharmacogenetic analyses                 | Pharmacogenetics variants and pregnancy                                                                                                                                     |
| <i>McPhail et al. [71]</i>      | Review               | Methadone, buprenorphine, morphine                   | /                                                   | Foetus and infant clinical complications | Pharmacokinetic and pharmacodynamic of opioids in infants with NOWS: challenges and future approaches                                                                       |
| <i>Liu et al. [72]</i>          | Clinical trial study | Morphine                                             | 34                                                  | Pharmacokinetic model analysis           | Description of the population PK of morphine in NAS                                                                                                                         |
| <i>van Hoogdaem et al. [73]</i> | Review               | Buprenorphine, clonidine, methadone, morphine        | /                                                   | Pharmacogenetic analyses                 | Influence of gestational age, postnatal age, and pharmacogenetics on the pharmacokinetics of drug therapies used in NOWS.                                                   |

|                            |                          |                                    |    |                          |                                                                                       |
|----------------------------|--------------------------|------------------------------------|----|--------------------------|---------------------------------------------------------------------------------------|
| <i>Wachman et al. [74]</i> | Multicenter cohort study | Methadone, buprenorphine           | 86 | Pharmacogenetic analyses | OPRM1 and COMT gene variants were associated with a shorter length of hospital stay   |
| <i>Albano et al. [75]</i>  | Review                   | Opioids                            | /  | Toxicological analyses   | Evidence-based approach for managing neonatal exposure to opioids                     |
| <i>Kintz et al. [76]</i>   | Research study           | Heroin, methadone                  | 24 | Toxicological analyses   | Interpretation issue in assessing neonatal drug exposure                              |
| <i>Baldo et al. [90]</i>   | Review                   | Methadone, buprenorphine, morphine | /  | Pharmacogenetic analyses | Pharmacogenomics of NOWS and respiratory depression                                   |
| <i>Wachman et al. [93]</i> | Experimental study       | Methadone, buprenorphine           | 86 | Epigenetic analyses      | Increased methylation within the OPRM1 promoter is associated with worse NAS outcomes |

**Table S2.** Fetal and infant outcomes associated with maternal opioid use.

| Article                      | Opioid class                                                          | Outcomes                                                                                                                                                                                                                                  |
|------------------------------|-----------------------------------------------------------------------|-------------------------------------------------------------------------------------------------------------------------------------------------------------------------------------------------------------------------------------------|
| <i>Kaltenbach et al. [1]</i> | Methadone, heroin                                                     | Spontaneous abortion, IUFD, IUGR, preeclampsia, premature labor/delivery, PROM, abruptio placentae, intrauterine passage of meconium, low Apgar scores                                                                                    |
| <i>Sithisarn et al. [2]</i>  | Opiates                                                               | SGA, altered neurobehavioral in infancy                                                                                                                                                                                                   |
| <i>Huestis et al. [8]</i>    | Methadone, heroin                                                     | Increased risk of abortion in case of sudden withdrawal, IUGR, SGA, NOWS; increased risk of SIDS                                                                                                                                          |
| <i>Lam et al. [9]</i>        | Methadone, heroin                                                     | Prematurity, SGA, antepartum hemorrhage, NOWS                                                                                                                                                                                             |
| <i>Fishman et al. [11]</i>   | Propoxyphene, codeine, tramadol, oxycodone, fentanyl                  | propoxyphene and codeine: perinatal death, low birth weight, SGA, low Apgar score (<8) at 1 and 5 minutes after birth; codeine: increased risk of spina bifida; third trimester exposition of opioids: low birth weight, perinatal death. |
| <i>Rausgaard et al. [14]</i> | Codeine, tramadol, oxycodone, morphine                                | No variations in prescription drugs and no difference in livebirth or stillborn babies                                                                                                                                                    |
| <i>Bashore et al. [16]</i>   | Heroin                                                                | Preeclampsia, IUGR, IUFD, NOWS                                                                                                                                                                                                            |
| <i>Anbalagan et al. [17]</i> | Methadone, heroin, buprenorphine                                      | NOWS, neurodevelopmental delays, behavioral problems, death                                                                                                                                                                               |
| <i>Ryan et al. [18]</i>      | Methadone, heroin, buprenorphine                                      | placental insufficiency, preterm birth, NOWS, low birth weight, SGA                                                                                                                                                                       |
| <i>Esposito et al. [19]</i>  | Prescription opioids in pregnancy (except opioid replacement therapy) | minimal increased risk of placental abruption, preterm birth, and SGA                                                                                                                                                                     |
| <i>Little et al. [21]</i>    | Heroin                                                                | Preterm birth, SGA, low birth weight infants                                                                                                                                                                                              |
| <i>O'Donnell et al. [22]</i> | Heroin                                                                | Neonates exposed to opioids in utero have a risk of neonatal abstinence syndrome (NAS) that is as high as 90%                                                                                                                             |
| <i>Kandall et al. [23]</i>   | Methadone, heroin                                                     | IUGR, low birth weight                                                                                                                                                                                                                    |

|                               |                                    |                                                                                                                                              |
|-------------------------------|------------------------------------|----------------------------------------------------------------------------------------------------------------------------------------------|
| <i>Wolff et al. [24]</i>      | Heroin, methadone                  | Generalized motor seizures and myoclonic jerks rates of occurrence ranging from 2% to 10% for infants withdrawing from opioids               |
| <i>Athanasakis et al [25]</i> | Opiates                            | Pregnancy exposition contribute to SIDS                                                                                                      |
| <i>Maguire et al. [26]</i>    | Methadone, buprenorphine           | Worse outcomes for impaired vision                                                                                                           |
| <i>Benck et al. [27]</i>      | Methadone, buprenorphine           | Accessing medications prevent erratic fetal opioid level withdrawals, fetal and neonatal morbidity and mortality                             |
| <i>Burns et al. [28]</i>      | Methadone                          | Higher infant death rate, mainly SIDS, in methadone maintenance therapy                                                                      |
| <i>Caritis et al. [29]</i>    | Morphine, methadone                | Alterations in white matter of the centrum ovale, longitudinal fasciculi, and capsules                                                       |
| <i>Cohen et al. [30]</i>      | Heroin, methadone                  | SIDS                                                                                                                                         |
| <i>Conradt et al. [31]</i>    | Morphine, methadone, buprenorphine | Alterations in IQ, neurologic performance and language performance                                                                           |
| <i>Dryden et al. [34]</i>     | Methadone                          | Smaller birthweight and head circumference                                                                                                   |
| <i>Epstein et al. [36]</i>    | Morphine, methadone, buprenorphine | Birth defects with early fetal exposure and neonatal abstinence syndrome with later fetal exposure                                           |
| <i>Galli et al. [37]</i>      | Methadone                          | In all cases ophthalmologic, oculomotor, and perceptive problems                                                                             |
| <i>Garrison et al. [38]</i>   | Morphine, methadone                | 49.2% incidence of microcephaly                                                                                                              |
| <i>Irnes et al. [39]</i>      | Morphine, methadone                | 6.5% smaller basal ganglia, 9.2% caudate, 7.6% thalamus and 10.3% cerebellar white matter                                                    |
| <i>Kandall et al. [40]</i>    | Heroin, methadone                  | Weak association between SIDS and opiate use                                                                                                 |
| <i>Kandall et al. [41]</i>    | Heroin, methadone                  | Opiate contribution to SIDS cause                                                                                                            |
| <i>Kushnir et al. [42]</i>    | Methadone, buprenorphine           | birth weight between groups (neonates in the Bup/Bup+ being significantly heavier than the Met/Met+ ones)                                    |
| <i>McCarthy et al. [43]</i>   | Methadone, buprenorphine           | Buprenorphine is associated with a lower risk of adverse out-comes than methadone concerning behavioural, emotional and cognitive regulation |
| <i>McGlone et al. [45]</i>    | Methadone                          | 40% failed clinical visual assessment; relative risk of abnormal assessment was 5.1                                                          |
| <i>Monnelly et al. [46]</i>   | Methadone                          | Mental Development Index weighted mean difference of children -4.3                                                                           |
| <i>Montanari et al. [47]</i>  | Methadone                          | IUFD high likely due to chronic fetal MTD intoxication, placental delayed villous maturation, and chorionic thrombosis                       |
| <i>Montanari et al. [48]</i>  | Methadone                          | Abnormal genetic profile of <i>CYP2B6</i> , <i>ABCB1</i> and <i>OPRM1</i> reducing methadone clearance                                       |
| <i>Newbury et al. [49]</i>    | Methadone                          | At age 9.5 years lower language scores than the non-exposed children                                                                         |
| <i>Ramirez et al. [54]</i>    | Methadone                          | Severe variable or late decelerations during the second stage of labor (44.2%)                                                               |
| <i>Serra et al. [57]</i>      | Methadone, buprenorphine           | Increased incidence of delayed villous maturation in the exposed placentas                                                                   |
| <i>Spowart et al. [58]</i>    | Methadone                          | Children had birthweights 236 g lighter on average and had smaller birth OFC by an average of 0.8 cm                                         |
| <i>Ward et al. [59]</i>       | Opiates                            | SIDS and cleft palate                                                                                                                        |
| <i>Towers et al. [60]</i>     | Morphine, methadone                | Head circumference for was 33.04 cm ( $\pm 1.9$ cm)                                                                                          |

|                             |                                  |                                                                                                                    |
|-----------------------------|----------------------------------|--------------------------------------------------------------------------------------------------------------------|
| <i>Whiteman et al. [61]</i> | Prescription opioid in pregnancy | Preterm labor, PROM, IUGR, IUFD                                                                                    |
| <i>Wurst et al. [63]</i>    | Methadone, buprenorphine         | Reduced risk of NOWS in buprenorphine, in methadone higher frequency of preterm birth and congenital malformations |

**Table S3.** Forensic techniques for detecting and quantifying opioids in maternal and infant samples.

| Article                      | Analytical techniques |
|------------------------------|-----------------------|
| <i>Bertaso et al. [5]</i>    | LC-MS/MS              |
| <i>Pötsch et al. [12]</i>    | GC-MS                 |
| <i>Concheiro et al. [32]</i> | LC-MS/MS              |
| <i>de Castro et al. [33]</i> | LC-MS/MS              |
| <i>López et al. [44]</i>     | GC-MS                 |
| <i>Pandya et al. [50]</i>    | LC-MS/MS              |
| <i>Ordean et al. [51]</i>    | /                     |
| <i>Ostrea et al. [52]</i>    | GC-MS                 |
| <i>Parikh et al. [53]</i>    | /                     |
| <i>Robert et al. [55]</i>    | LC-MS/MS              |
| <i>Ross et al. [56]</i>      | /                     |
| <i>Walhovd et al. [62]</i>   | /                     |
| <i>Zedler et al. [64]</i>    | /                     |
| <i>Zipursky et al. [65]</i>  | /                     |
| <i>Albano et al. [75]</i>    | /                     |
| <i>Kintz et al. [76]</i>     | LC-MS/MS              |

**Table S4.** Genetic and epigenetic factors associated with opioid-related adverse outcomes.

| Article                     | Article type               | Opioid class | Sample size                           | Issue of interest        | Main findings                                                                   |
|-----------------------------|----------------------------|--------------|---------------------------------------|--------------------------|---------------------------------------------------------------------------------|
| <i>Montanari et al [48]</i> | Experimental research      | Methadone    | Stillborn (N=1)                       | Pharmacogenetic analyses | Association between CYP2B6 variant alleles and stillborn methadone intoxication |
| <i>Mactier et al. [70]</i>  | Observational cohort study | Methadone    | MMOD mother and their newborns (N=21) | Pharmacogenetic analyses | Higher frequency of homozygous allele at 516 and 785 regions of CYP2B6          |

|                                                                                                                                                        |                           |                               |                                          |                          |                                                                                                                                                       |
|--------------------------------------------------------------------------------------------------------------------------------------------------------|---------------------------|-------------------------------|------------------------------------------|--------------------------|-------------------------------------------------------------------------------------------------------------------------------------------------------|
|                                                                                                                                                        |                           |                               |                                          |                          | gene in treated infants leading to severity of NAS                                                                                                    |
| <i>Wachman et al. [74]</i>                                                                                                                             | Cohort study              | Morphine/<br>Buprenorphine    | Mother/infant pairs<br>(N=113)           | Genetic analyses         | Infants with the rs1799971 AG or GG genotypes experience shorter hospital stays for the treatment of NAS in comparison to those with the AA genotype. |
| <i>Koren et al [77]</i><br><i>Madadi, et al [78]</i><br><i>Friedrichsdorf, et al. [79]</i><br><i>Madadi, et al [80]</i><br><i>Sistonen, et al [81]</i> | Case and cohort studies   | Morphine/<br>Methadone        | Mother-infant pairs (Total N=188)        | Pharmacogenetic analyses | High risk of opioid toxicity in breastfed infant associated with <i>CYP2D6</i> and <i>ABCB1</i> mother's genetic polymorphism                         |
| <i>Claessens et al [82]</i>                                                                                                                            | Experimental study        | Clonidine                     | Pregnant women (N=17)                    | Pharmacogenetic analyses | Increase in clonidine oral clearance in pregnant women primarily mediated by <i>CYP2D6</i>                                                            |
| <i>Badaoui et al [83]</i>                                                                                                                              | Pharmacokinetic modelling | Codeine/Morphine              | Pregnant females/foetus (N=250)          | Pharmacogenetic analyses | Higher risk to foetal morphine exposure in the first trimester of pregnancy                                                                           |
| <i>Pogliani et al [84]</i>                                                                                                                             | Case report               | Morphine                      | Pre-term newborn (N=1)                   | Pharmacogenetic analyses | Opioid-induced urinary retention linked to a homozygous for the C3435T polymorphism in the <i>ABCB1</i> gene                                          |
| <i>Elens et al [85]</i>                                                                                                                                | Experimental study        | Remifentanyl/Morphine         | Pre-term newborns (N=34)                 | Pharmacogenetic analyses | Predisposition to a slow opioid response in preterm newborns carrying the KCNJ6 -1250G.A and the COMT c.472G.A alleles                                |
| <i>Matic et al [86]</i>                                                                                                                                | Cohort study              | Morphine                      | Pre-term newborns (N=34)                 | Pharmacogenetic analyses | The combined <i>OPRM1/COMT</i> 'high-risk' genotype led to a significant association with the need for rescue                                         |
| <i>Hronová et al [87]</i>                                                                                                                              | Retrospective study       | Sufentanil                    | Newborns (N=30)                          | Pharmacogenetic analyses | COMT and <i>ABCB1</i> polymorphism influence the sufentanil dosing                                                                                    |
| <i>Matic et al [88]</i>                                                                                                                                | Cohort study              | Morphine                      | Pre-term newborns (N=15)                 | Pharmacogenetic analyses | The UGT2B7 -900G>A polymorphism significantly alters morphine pharmacokinetics in preterm infants.                                                    |
| <i>Matic et al. [89]</i>                                                                                                                               | Retrospective study       | Methadone                     | Pre-term ill newborns and infants (N=50) | Pharmacogenetic analyses | Combination of <i>CYP2D6</i> and <i>SLC22A1/OCT1</i> polymorphism influence O-desmethyltramadol PK                                                    |
| <i>Dennis et al [91]</i>                                                                                                                               | Review                    | Methadone                     | /                                        | Pharmacogenetic analyses | Methadone metabolism is significantly slower in *6 homozygous carriers                                                                                |
| <i>Wachman al. [92]</i>                                                                                                                                | Cohort study              | Methadone or<br>buprenorphine | Infants treated for NOWS (N=68)          | Epigenetic analyses      | High levels of <i>OPRM1</i> methylation at specific CpG sites influence the increased NAS severity                                                    |
